# Supplementary material for: Correlation between Inflammasomes and Microbiota in Peri-Implantitis
Source: MDPI journal article supplement (doi:10.3390/ijms25020961), 2024-01-12
Supplement: s1 [file s1]

## CORRELATION BETWEEN INFLAMMASOMES AND MICROBIOTA IN PERI-IMPLANTITIS

## SUPPLEMENTARY TABLES

**Supplementary Table S1:** Correlation between clinical and histological and immunohistochemical variables. Values indicate Spearman's rho correlation coefficient (p value).

[illegible]

**Supplementary Table S2:** Diversity indexes.

| Index           | Value           | Lower confidence interval (95%) | Upper confidence interval (95%) |
|-----------------|-----------------|---------------------------------|---------------------------------|
| Chao            | 715.84 (234.32) | 510.64 (174.16)                 | 1068.90 (326.84)                |
| Inverse Simpson | 10.84 (5.34)    | 10.00 (4.91)                    | 11.83 (5.86)                    |
| Shannon         | 3.26 (0.48)     | 3.18 (0.48)                     | 3.34 (0.48)                     |
| Pielou          | 0.61 (0.07)     | -                               | -                               |
